# Supplementary material for: Diversity and Distribution of Macrofungi in Protected Mountain Forest Habitats in Serbia and Its Relation to Abiotic Factors
Source: MDPI journal article supplement (doi:10.3390/jof8101074), 2022-10-13
Supplement: s1 [file s1]

Tabela S1. Macrofungal species recorded in protected mountain forest habitats in Serbia

| SPECIES                                                      | FG  | Number of records |    |    |     |    | I year |      |        |    | II year |      |        | III year |      |        |        | F  |
|--------------------------------------------------------------|-----|-------------------|----|----|-----|----|--------|------|--------|----|---------|------|--------|----------|------|--------|--------|----|
|                                                              |     | P1                | P2 | P3 | P4  | P5 | VI     | VII  | VIII   | IX | VI      | VII  | VIII   | VI       | VII  | VIII   | IX     |    |
| <b>total number of species*</b>                              |     | 53                | 48 | 59 | 110 | 80 | 32     | 38   | 53     | 30 | 33      | 19   | 26     | 69       | 71   | 31     | 54     |    |
| <b>ASCOMYCOTA</b>                                            |     |                   |    |    |     |    |        |      |        |    |         |      |        |          |      |        |        |    |
| <i>Bisporella citrina</i> (Batsch) Korf & S.E. Carp.         | Lig |                   |    |    | 1   |    |        |      |        |    |         |      |        |          | P4   |        |        | 1  |
| <i>Caloscypha fulgens</i> (Pers.) Boud.                      | Ter |                   |    |    |     | 1  |        |      |        |    |         |      |        | P5       |      |        |        | 1  |
| <i>Disciotis venosa</i> (Pers.) Arnould                      | Lig | 1                 |    |    |     |    |        |      |        |    | P1      |      |        |          |      |        |        | 1  |
| <i>Helvella calycina</i> Skrede, T.A. Carlsen & T. Schumach. | Lig |                   |    |    | 1   |    |        |      |        |    |         |      |        | P4       |      |        |        | 1  |
| <i>Hypoxylon fragiforme</i> (Pers.) J. Kickx f.              | Lig |                   |    |    | 1   |    |        | P4   |        |    |         |      |        |          |      |        |        | 1  |
| <i>Kretzschmaria deusta</i> (Hoffm.) P.M.D. Martin           | Lig |                   |    |    | 1   |    |        |      |        |    |         |      | P4     |          |      |        |        | 1  |
| <i>Lachnellula resinaria</i> (Cooke & W. Phillips) Rehm      | Lig |                   |    | 1  |     |    |        |      |        |    |         |      |        |          |      | P3     |        | 1  |
| <i>Neobulgaria pura</i> (Pers.) Petr.                        | Lig |                   |    |    | 2   | 1  |        |      |        |    |         |      |        |          | P4,5 |        | P4     | 3  |
| <i>Peziza phyllogena</i> Cooke                               | Ter | 1                 |    |    |     |    | P1     |      |        |    |         |      |        |          |      |        |        | 1  |
| <i>Spathularia flavida</i> Pers.                             | Lig |                   | 2  |    |     |    |        |      | P2     |    |         |      |        |          |      | P2     |        | 2  |
| <i>Vibrissea truncorum</i> (Alb. & Schwein.) Fr.             | Lig |                   |    |    | 3   |    | P4     |      |        |    | P4      |      |        | P4       |      |        |        | 3  |
| <i>Xylaria carpophila</i> (Pers.) Fr.                        | Lig | 2                 |    |    | 1   |    |        |      |        |    |         |      |        | P1,4     |      | P1     |        | 3  |
| <i>Xylaria hypoxylon</i> (L.) Grev.                          | Lig | 1                 | 1  |    | 3   | 1  |        | P4,5 |        |    |         |      | P4     |          |      | P1,2,4 |        | 6  |
| <b>BASIDIOMYCOTA</b>                                         |     |                   |    |    |     |    |        |      |        |    |         |      |        |          |      |        |        |    |
| <i>Agaricus sylvicola</i> (Vittad.) Peck                     | Ter |                   | 1  |    |     |    |        |      |        |    |         |      |        | P2       |      |        |        | 1  |
| <i>Agrocybe praecox</i> (Pers.) Fayod                        | Lig | 1                 |    |    |     |    |        |      |        |    |         |      |        |          |      | P1     |        | 1  |
| <i>Amanita battarrae</i> (Boud.) Bon                         | Mik |                   |    | 5  | 1   |    |        | P3   | P3     |    |         | P3   |        |          |      | P3,4   | P3     | 6  |
| <i>Amanita excelsa</i> (Fr.) Bertill.                        | Mik |                   |    |    | 1   |    |        |      | P4     |    |         |      |        |          |      |        |        | 1  |
| <i>Amanita fulva</i> Fr.                                     | Mik |                   | 1  |    |     |    |        |      |        |    |         |      |        |          |      | P2     |        | 1  |
| <i>Amanita rubescens</i> Pers.                               | Mik |                   | 1  |    |     | 2  | P2     |      | P5     |    |         |      |        |          |      | P5     |        | 3  |
| <i>Bjerkandera adusta</i> (Willd.) P. Karst.*                | Lig | 1                 |    | 1  | 6   | 1  | P3,4   | P4   | P4     |    | P1      |      | P4     | P4       |      | P4,5   |        | 9  |
| <i>Boletus edulis</i> Bull.                                  | Mik |                   |    |    | 2   |    |        |      |        |    |         |      |        |          |      | P4     | P4     | 2  |
| <i>Boletus fechtneri</i> Velen.                              | Mik |                   |    |    |     | 1  |        |      |        |    |         |      | P5     |          |      |        |        | 1  |
| <i>Boletus luridiformis</i> Rostk.                           | Mik |                   |    |    | 2   | 1  |        |      |        |    |         |      | P4,5   |          |      |        | P4     | 3  |
| <i>Boletus subtomentosus</i> L.                              | Mik |                   |    |    | 1   |    |        |      |        |    |         |      |        |          |      |        | P4     | 1  |
| <i>Caloboletus calopus</i> (Pers.) Vizzini                   | Mik |                   |    |    | 3   |    |        | P4   |        |    |         |      | P4     |          |      | P4     |        | 3  |
| <i>Calocera cornea</i> (Batsch) Fr.                          | Lig |                   |    |    | 4   | 1  |        | P4   |        |    |         |      |        | P4       |      | P4,5   | P4     | 5  |
| <i>c</i> (Fr.) Fr.                                           | Lig |                   | 1  |    |     |    |        | P2   |        |    |         |      |        |          |      |        |        | 1  |
| <i>Calocera viscosa</i> (Pers.) Fr.*                         | Lig |                   | 1  | 3  | 4   | 1  |        | P4   | P5     |    |         |      | P3     | P4       |      | P4     | P3     | 9  |
| <i>Cantharellus cibarius</i> Fr.*                            | Mik |                   | 1  | 1  | 1   | 2  |        | P4,5 | P2,P5  | P3 |         |      |        |          |      |        | P2,3,4 | 5  |
| <i>Cerioporus varius</i> (Pers.) Zmitr. & Kovalenko*         | Lig | 8                 | 2  | 7  |     | 1  | P1,3   | P1,3 | P1,2,3 | P3 | P3      | P1,3 | P1,2,5 | P1       |      | P1,3   | P3     | 19 |
| <i>Chalciporus piperatus</i> (Bull.) Bataille                | Mik |                   |    |    |     | 1  |        |      |        |    |         |      |        | P5       |      |        |        | 1  |

|                                                                           |     |   |   |   |   |  |        |        |      |      |    |    |    |        |  |      |    |    |    |
|---------------------------------------------------------------------------|-----|---|---|---|---|--|--------|--------|------|------|----|----|----|--------|--|------|----|----|----|
| <i>Climacocystis borealis</i> (Fr.) Kotl. & Pouzar                        | Lig |   |   | 1 |   |  |        |        |      |      |    |    |    |        |  |      |    | P5 | 1  |
| <i>Clitocybe gibba</i> (Pers.) P. Kumm.                                   | Ter |   | 2 | 1 |   |  | P5     |        |      |      |    |    |    |        |  |      |    | P3 | 3  |
| <i>Clitocybe nebularis</i> (Batsch) P. Kumm.                              | Ter |   | 1 |   |   |  |        |        |      |      |    |    |    |        |  |      |    | P3 | 1  |
| <i>Coprinellus micaceus</i> (Bull.) Vilgalys, Hopple & Jacq. Johnson      | Lig |   | 1 | 2 |   |  |        |        |      | P3   |    |    | P4 |        |  |      |    | P4 | 3  |
| <i>Coprinellus xanthothrix</i> (Romagn.) Vilgalys, Hopple & Jacq. Johnson | Ter | 3 |   |   |   |  | P1     |        |      |      | P1 |    | P1 |        |  |      |    |    | 3  |
| <i>Coprinopsis lagopus</i> (Fr.) Redhead, Vilgalys & Moncalvo             | Ter | 1 |   |   |   |  |        |        |      |      |    |    | P1 |        |  |      |    |    | 1  |
| <i>Cortinarius croceus</i> (Schaeff.) Gray                                | Mik |   | 1 |   |   |  |        |        |      |      |    |    |    |        |  |      |    | P3 | 1  |
| <i>Cortinarius evernius</i> (Fr.) Fr.                                     | Mik |   |   | 2 |   |  | P4     |        |      |      |    | P4 |    |        |  |      |    |    | 2  |
| <i>Cortinarius flexipes</i> (Pers.) Fr.                                   | Mik |   |   | 1 |   |  |        |        |      |      |    | P4 |    |        |  |      |    |    | 1  |
| <i>Cortinarius sanguineus</i> (Wulfen) Gray                               | Mik |   |   | 1 |   |  |        |        |      |      |    | P4 |    |        |  |      |    |    | 1  |
| <i>Cortinarius semisanguineus</i> (Fr.) Gillet                            | Mik |   |   |   | 1 |  |        |        | P5   |      |    |    |    |        |  |      |    |    | 1  |
| <i>Craterellus tubaeformis</i> (Fr.) Quél.                                | Mik |   |   | 2 |   |  |        |        |      | P4   |    |    |    |        |  |      |    | P4 | 2  |
| <i>Crepidotus variabilis</i> (Pers.) P. Kumm.                             | Lig |   | 1 |   |   |  |        |        | P3   |      |    |    |    |        |  |      |    |    | 1  |
| <i>Dacrymyces capitatus</i> Schwein.                                      | Lig |   |   | 1 |   |  |        |        |      |      | P4 |    |    |        |  |      |    |    | 1  |
| <i>Dacrymyces chrysospermus</i> Berk. & M.A. Curtis                       | Lig |   |   |   | 1 |  |        |        | P5   |      |    |    |    |        |  |      |    |    | 1  |
| <i>Dacrymyces stillatus</i> Nees                                          | Lig | 1 | 1 |   |   |  | P2     |        |      |      |    |    |    |        |  |      |    | P3 | 2  |
| <i>Daedalea quercina</i> (L.) Pers.                                       | Lig |   |   |   | 1 |  |        |        |      |      |    |    |    |        |  |      | P5 |    | 1  |
| <i>Daedaleopsis confragosa</i> (Bolton) J. Schröt.                        | Lig |   |   | 1 |   |  | P4     |        |      |      |    |    |    |        |  |      |    |    | 1  |
| <i>Datronia mollis</i> (Sommerf.) Donk                                    | Lig |   |   | 1 |   |  |        |        |      |      |    |    | P4 |        |  |      |    |    | 1  |
| <i>Echinoderma asperum</i> (Pers.) Bon                                    | Ter | 1 |   |   |   |  |        |        |      |      |    |    |    |        |  |      | P1 |    | 1  |
| <i>Entocybe nitida</i> (Quél.) T.J. Baroni, Largent & V. Hofst.           | Ter |   |   | 1 |   |  |        |        |      |      |    |    |    |        |  |      |    | P4 | 1  |
| <i>Entoloma serrulatum</i> (Fr.) Hesler                                   | Lig |   |   |   | 1 |  |        |        |      |      |    |    |    |        |  |      | P5 |    | 1  |
| <i>Exidia thuretiana</i> (Lév.) Fr.                                       | Lig |   |   | 1 |   |  |        |        |      |      |    |    | P4 |        |  |      |    |    | 1  |
| <i>Flammulaster carpophilus</i> (Fr.) Earle ex Vellinga                   | Ter | 2 |   |   |   |  | P1     |        |      |      |    |    | P1 |        |  |      |    |    | 2  |
| <i>Flammulaster muricatus</i> (Fr.) Watling                               | Lig | 1 |   |   |   |  | P1     |        |      |      |    |    |    |        |  |      |    |    | 1  |
| <i>Flammulina velutipes</i> (Curtis) Singer                               | Lig |   | 1 |   |   |  |        |        |      |      |    |    |    |        |  |      |    | P3 | 1  |
| <i>Fomes fomentarius</i> (L.) Fr.                                         | Lig |   | 2 | 1 | 2 |  |        |        | P3,5 |      |    | P3 |    | P5     |  |      |    |    | 5  |
| <i>Fomitopsis pinicola</i> (Sw.) P. Karst.                                | Lig |   | 2 | 3 | 7 |  | P4,5   | P5     | P5   | P5   |    | P3 | P5 | P3,4,5 |  |      |    | P4 | 12 |
| <i>Galerina hypnorum</i> (Schränk) Kühner                                 | Lig |   |   | 1 |   |  |        |        |      |      |    |    |    |        |  |      |    |    | 1  |
| <i>Galerina marginata</i> (Batsch) Kühner                                 | Lig |   |   | 1 |   |  |        |        |      |      |    | P4 |    |        |  |      |    |    | 1  |
| <i>Ganoderma applanatum</i> (Pers.) Pat.                                  | Lig |   |   | 8 | 5 |  | P4,5   | P4     | P4,5 | P4,5 |    | P5 | P4 | P4,5   |  |      |    | P4 | 13 |
| <i>Geastrum quadrifidum</i> DC. ex Pers.                                  | Ter | 1 |   |   |   |  |        |        | P2   |      |    |    |    |        |  |      |    |    | 1  |
| <i>Gloeophyllum odoratum</i> (Wulfen) Imazeki                             | Lig |   |   | 3 |   |  |        |        |      |      |    |    | P4 |        |  | P4   | P4 |    | 3  |
| <i>Guepinia helvelloides</i> (DC.) Fr.                                    | Lig |   |   | 1 |   |  |        |        |      |      |    |    |    |        |  | P4   |    |    | 1  |
| <i>Gymnopus androsaceus</i> (L.) Della Magg. & Trassin.*                  | Ter | 2 | 3 | 1 | 2 |  | P2,3,5 | P2,3,5 |      |      |    |    |    |        |  | P3,4 |    |    | 8  |

|                                                               |     |   |   |   |  |   |      |        |    |    |      |      |        |        |        |      |  |    |
|---------------------------------------------------------------|-----|---|---|---|--|---|------|--------|----|----|------|------|--------|--------|--------|------|--|----|
| <i>Gymnopus confluens</i> (Pers.) Antonín, Halling & Noordel. | Ter | 1 |   |   |  |   |      |        | P1 |    |      |      |        |        |        |      |  | 1  |
| <i>Gymnopus dryophilus</i> (Bull.) Murrill*                   | Ter | 2 | 1 | 3 |  | 2 | P3   | P5     | P3 |    |      |      | P1,2   | P1,3,5 |        |      |  | 8  |
| <i>Gymnopus foetidus</i> (Sowerby) P.M. Kirk                  | Ter | 3 |   |   |  | 1 | P1   |        |    |    | P1   |      | P1     | P4     |        |      |  | 4  |
| <i>Gymnopus perforans</i> (Hoffm.) Antonín & Noordel.         | Ter |   |   | 1 |  |   |      |        |    | P3 |      |      |        |        |        |      |  | 1  |
| <i>Gyroporus castaneus</i> (Bull.) Quél.                      | Mik |   |   |   |  | 1 |      |        |    |    |      |      |        | P4     |        |      |  | 1  |
| <i>Gyroporus cyanescens</i> (Bull.) Quél.                     | Mik |   |   | 1 |  |   |      |        |    |    | P3   |      |        |        |        |      |  | 1  |
| <i>Hemimycena lactea</i> (Pers.) Singer                       | Ter |   |   |   |  | 2 |      |        | P5 |    |      |      | P4     | P4     |        |      |  | 3  |
| <i>Hericium coralloides</i> (Scop.) Pers.                     | Lig |   |   |   |  |   |      |        |    | P5 |      |      | P5     | P5     |        |      |  | 3  |
| <i>Hydnum repandum</i> L.                                     | Mik |   | 1 |   |  | 1 |      |        | P2 | P5 |      |      |        |        |        |      |  | 2  |
| <i>Hydropus subalpinus</i> (Höhn.) Singer                     | Ter | 1 |   | 2 |  |   | P3   |        |    |    |      |      | P1     | P3     |        |      |  | 3  |
| <i>Hygrophorus erubescens</i> (Fr.) Fr.                       | Mik |   |   | 1 |  |   |      |        | P3 |    |      |      |        |        |        |      |  | 1  |
| <i>Hymenopellis radicata</i> (Relhan) R.H. Petersen*          | Lig | 8 | 2 | 2 |  | 1 | P1   | P1     | P2 | P1 | P1   | P2,3 | P1     | P1     | P1,3,4 | P1   |  | 13 |
| <i>Hypholoma capnoides</i> (Fr.) P. Kumm.                     | Lig |   | 1 |   |  |   |      |        |    |    |      |      |        | P2     |        |      |  | 1  |
| <i>Hypholoma fasciculare</i> (Huds.) P. Kumm.*                | Lig | 3 | 1 | 3 |  | 2 |      |        | P1 |    | P1,3 | P3   | P2,5   | P1     | P3,4   | P4   |  | 10 |
| <i>Hypholoma lateritium</i> (Schaeff.) P. Kumm.               | Lig |   |   |   |  | 1 |      |        |    |    |      | P5   | P4     |        |        |      |  | 2  |
| <i>Laccaria amethystina</i> Cooke                             | Mik |   |   |   |  | 1 |      |        | P5 |    |      |      |        |        |        |      |  | 1  |
| <i>Laccaria laccata</i> (Scop.) Cooke                         | Mik |   | 3 | 1 |  |   |      |        |    | P3 | P2   |      | P2     | P2     |        |      |  | 4  |
| <i>Laccaria longipes</i> G.M. Muell.                          | Mik |   |   |   |  | 1 |      |        |    | P4 |      |      |        |        |        |      |  | 1  |
| <i>Lactarius vellereus</i> (Fr.) Fr.                          | Mik |   | 3 |   |  |   |      | P2     |    |    |      |      |        |        | P2     | P2   |  | 3  |
| <i>Lactarius volemus</i> (Fr.) Fr.                            | Mik |   | 2 |   |  |   |      |        | P2 |    |      |      |        |        | P2     |      |  | 2  |
| <i>Lentinellus micheneri</i> (Berk. & M.A. Curtis) Pegler     | Lig |   |   |   |  | 1 |      |        |    |    |      |      |        |        | P4     |      |  | 1  |
| <i>Lycoperdon echinatum</i> Pers.                             | Ter | 1 |   |   |  | 1 |      |        |    | P5 |      |      |        | P1     |        |      |  | 2  |
| <i>Lycoperdon perlatum</i> Pers.*                             | Ter |   | 1 | 2 |  | 1 |      |        |    |    |      |      |        | P2     | P3     | P3,5 |  | 4  |
| <i>Chlorophyllum rhacodes</i> (Vittad.) Vellinga              | Ter |   |   | 1 |  |   |      |        |    |    |      |      |        |        | P3     |      |  | 1  |
| <i>Marasmius bulliardii</i> Quél                              | Ter | 6 |   |   |  | 1 | P1,5 | P4     |    |    | P1   |      | P1     | P1     | P1     | P1   |  | 8  |
| <i>Marasmius rotula</i> (Scop.) Fr.                           | Ter | 2 | 2 |   |  | 2 | P1,2 | P1,2,5 |    |    |      |      |        | P4,5   |        | P4   |  | 8  |
| <i>Megacollybia platyphylla</i> (Pers.) Kotl. & Pouzar        | Lig | 4 | 1 |   |  | 2 | P1   |        | P1 |    | P1,2 | P4   | P1     |        | P4     |      |  | 7  |
| <i>Micromphale perforans</i> (Hoffm.) Antonín & Noordel.      | Ter |   |   |   |  | 1 |      | P4,5   |    |    |      |      |        |        |        |      |  | 2  |
| <i>Mucidula mucida</i> (Schrad.) Pat.                         | Lig |   |   | 1 |  | 1 |      |        |    | P5 | P3,5 |      |        |        |        | P4   |  | 4  |
| <i>Mycena acicula</i> (Schaeff.) P. Kumm.                     | Lig | 1 |   |   |  | 1 |      |        |    |    |      |      | P4     | P1     |        |      |  | 2  |
| <i>Mycena arcangeliana</i> Bres.                              | Lig |   |   |   |  | 1 |      |        |    |    | P4   |      |        |        |        |      |  | 1  |
| <i>Mycena epipterygia</i> (Scop.) Gray                        | Lig |   |   |   |  | 2 |      | P4     |    |    | P4   |      |        |        |        |      |  | 2  |
| <i>Mycena galericulata</i> (Scop.) Gray*                      | Lig | 1 | 1 | 2 |  | 1 | P3   |        |    |    |      |      | P1,2,5 | P4     |        | P3   |  | 6  |
| <i>Mycena galopus</i> (Pers.) P. Kumm.                        | Ter |   | 1 |   |  | 3 |      | P4,5   |    |    |      |      | P2,4   | P4,5   |        |      |  | 6  |
| <i>Mycena haematopus</i> (Pers.) P. Kumm.                     | Lig | 1 |   |   |  | 1 |      |        |    |    |      |      | P1,4   |        |        |      |  | 2  |

[illegible]

[illegible]

Note: Specimens identified to the genus level (5 among Ascomycota and 79 among Basidiomycota) are excluded from the table (represented list of species), for easier visibility. They can be obtained on request.
